# Supplementary material for: Parylene C as an Insulating Polymer for Implantable Neural Interfaces: Acute Electrochemical Impedance Behaviors in Saline and Pig Brain In Vitro
Source: MDPI journal article supplement (doi:10.3390/polym14153033), 2022-07-27
Supplement: s1 [file s1]

**Table S1.** Statistical values of electrochemical impedance in both saline and pig brain model at the representative frequencies.

|                                    | Electrolyte | Mean     | Standard deviation (S.D.) | Min.    | First quartile (Q1) | Median   | Third quartile (Q3) | Max.     |
|------------------------------------|-------------|----------|---------------------------|---------|---------------------|----------|---------------------|----------|
| Magnitude at 100 kHz (k $\Omega$ ) | saline      | 12.58    | 3.68                      | 5.64    | 10.02               | 13.16    | 15.13               | 20.47    |
|                                    | brain       | 64.69    | 25.84                     | 13.64   | 47.13               | 61.09    | 81.13               | 127.51   |
| Phase at 100 kHz (°)               | saline      | -51.81   | 3.94                      | -58.96  | -54.28              | -52.63   | -49.37              | -41.86   |
|                                    | brain       | -38.72   | 12.68                     | -84.75  | -43.82              | -35.86   | -30.30              | -16.34   |
| Magnitude at 1 kHz (k $\Omega$ )   | saline      | 256.32   | 88.73                     | 129.81  | 192.35              | 242.27   | 301.13              | 484.13   |
|                                    | brain       | 503.74   | 177.92                    | 61.09   | 388.72              | 516.01   | 616.02              | 903.56   |
| Phase at 1 kHz (°)                 | saline      | -50.22   | 5.50                      | -63.67  | -53.96              | -49.60   | -45.39              | -41.52   |
|                                    | brain       | -51.52   | 6.51                      | -64.67  | -55.81              | -52.34   | -46.75              | -38.21   |
| Magnitude at 12 Hz (k $\Omega$ )   | saline      | 2016.67  | 2016.67                   | 2016.67 | 2016.67             | 2016.67  | 2016.67             | 2016.67  |
|                                    | brain       | 2016.67  | 2016.67                   | 2016.67 | 2016.67             | 2016.67  | 2016.67             | 2016.67  |
| Phase at 12 Hz (°)                 | saline      | -46.86   | 7.85                      | -61.04  | -52.83              | -46.69   | -40.36              | -32.62   |
|                                    | brain       | -38.43   | 8.48                      | -55.14  | -44.42              | -38.32   | -32.85              | -22.20   |
| Magnitude at 1 Hz (k $\Omega$ )    | saline      | 8056.29  | 3263.49                   | 3462.48 | 4806.73             | 9535.34  | 10547.00            | 16732.50 |
|                                    | brain       | 13322.30 | 6237.07                   | 2911.10 | 7297.37             | 13023.00 | 18981.90            | 23885.30 |
| Phase at 1 Hz (°)                  | saline      | -47.70   | 7.02                      | -58.33  | -53.86              | -48.94   | -41.79              | -33.10   |
|                                    | brain       | -39.73   | 8.82                      | -56.93  | -46.54              | -38.21   | -31.82              | -25.13   |

**Table S2.** Statistical report of the comparison between electrochemical impedance (magnitude and phase) in the saline and the pig brain model at the representative frequencies. Degree of Freedom = 1.

|                      | F-value   | $\chi^2$ -value | p-value     |
|----------------------|-----------|-----------------|-------------|
| Magnitude at 100 kHz | 167.33427 | -               | 0           |
| Phase at 100 kHz     | -         | 33.43554        | 7.36654E-9  |
| Magnitude at 1 kHz   | -         | 40.00392        | 2.53454E-10 |
| Phase at 1 kHz       | 0.95183   | -               | 0.3322      |
| Magnitude at 12 Hz   | -         | 44.3006         | 2.8163E-11  |
| Phase at 12 Hz       | 21.83147  | -               | 1.18607E-5  |
| Magnitude at 1 Hz    | -         | 15.07451        | 1.03349E-4  |
| Phase at 1 Hz        | -         | 14.77694        | 1.21006E-4  |

**Table S3.** The statistical fitted parameters of equivalent circuit model in both saline and pig brain model

|                            | Electrolyte | Mean    | Standard deviation (S.D.) | Min.   | First quartile (Q1) | Median  | Third quartile (Q3) | Max.    |
|----------------------------|-------------|---------|---------------------------|--------|---------------------|---------|---------------------|---------|
| Capacitance 1 (pF)         | saline      | 26.29   | 34.37                     | 0.04   | 1.35                | 6.06    | 49.26               | 114.71  |
|                            | brain       | 4.04    | 8.82                      | 0.16   | 0.27                | 0.84    | 2.72                | 37.93   |
| Capacitance 2 (pF)         | saline      | 94.51   | 89.65                     | 8.00   | 25.99               | 73.48   | 129.48              | 440.72  |
|                            | brain       | 15.43   | 30.32                     | 0.80   | 1.62                | 3.99    | 9.83                | 156.23  |
| Resistance 1 (k $\Omega$ ) | saline      | 1097.38 | 867.39                    | 219.53 | 522.65              | 755.40  | 1381.44             | 4372.89 |
|                            | brain       | 2145.97 | 1890.58                   | 18.30  | 325.07              | 1803.71 | 3330.09             | 7420.84 |
| Q of CPE 1 (nS)            | saline      | 35.32   | 34.36                     | 1.18   | 8.12                | 21.40   | 63.32               | 103.59  |
|                            | brain       | 40.83   | 44.98                     | 0.99   | 8.63                | 18.28   | 72.54               | 203.02  |
| Alpha of CPE 1             | saline      | 0.66    | 0.14                      | 0.45   | 0.52                | 0.64    | 0.78                | 0.93    |
|                            | brain       | 0.61    | 0.15                      | 0.35   | 0.48                | 0.59    | 0.70                | 0.93    |
| Q of CPE 2 (nS)            | saline      | 22.73   | 29.29                     | 1.49   | 3.58                | 12.89   | 24.54               | 116.18  |
|                            | brain       | 12.24   | 17.41                     | 1.10   | 2.00                | 3.97    | 15.21               | 80.65   |
| Alpha of CPE 2             | saline      | 0.63    | 0.13                      | 0.39   | 0.53                | 0.61    | 0.74                | 0.87    |
|                            | brain       | 0.59    | 0.27                      | -0.28  | 0.43                | 0.70    | 0.78                | 0.87    |
| Resistance 2 (k $\Omega$ ) | saline      | 5.79    | 1.90                      | 1.23   | 4.31                | 5.63    | 7.30                | 11.41   |
|                            | brain       | 222.97  | 390.26                    | 13.70  | 43.37               | 61.08   | 138.63              | 1984.72 |
| Capacitance 3 (pF)         | saline      | 81.59   | 31.70                     | 49.49  | 64.09               | 73.97   | 85.51               | 221.79  |
|                            | brain       | 362.70  | 1245.44                   | 8.35   | 13.00               | 15.13   | 67.68               | 7691.23 |

**Table S4.** Statistical report of the comparison between the fitted parameters in the saline and the pig brain model. Degree of Freedom = 1.

|                | $\chi^2$ -value | p-value     |
|----------------|-----------------|-------------|
| Capacitance 1  | 39.07325        | 4.08198E-10 |
| Capacitance 2  | 21.8267         | 2.98418E-6  |
| Resistance 1   | 4.25858         | 0.03905     |
| Q of CPE 1     | 0.00901         | 0.92436     |
| Alpha of CPE 1 | 2.90318         | 0.08841     |
| Q of CPE 2     | 5.97011         | 0.01455     |
| Alpha of CPE 2 | 0.02399         | 0.8769      |
| Resistance 2   | 57.75949        | 2.96207E-14 |
| Capacitance 3  | 15.85921        | 6.82336E-5  |
